# Supplementary material for: Visualizing semipermeability of the cell membrane using a pH-responsive ratiometric AIEgen
Source: PubMed Central journal article supplement (PMC7422962; doi:10.1039/d0sc02097d), 2020-05-15
Supplement: SC-011-D0SC02097D-s001.pdf [file SC-011-D0SC02097D-s001.pdf]

Electronic Supplementary Information

## Visualizing Semipermeability of Cell Membrane by a pH-responsive Ratiometric AIEgen

Yuan Gu,<sup>ab</sup> Zheng Zhao,<sup>ab</sup> Guangle Niu,<sup>ab</sup> Han Zhang,<sup>c</sup> Yiming Wang,<sup>ab</sup> Ryan T. K. Kwok,<sup>ab</sup> Jacky W. Y. Lam,<sup>ab</sup> and Ben Zhong Tang<sup>\*abc</sup>

<sup>a</sup> Department of Chemical and Biological Engineering, Department of Chemistry, the Hong Kong Branch of Chinese National Engineering Research Center for Tissue Restoration and Reconstruction and Institute for Advanced Study, The Hong Kong University of Science and Technology, Clear Water Bay, Kowloon, Hong Kong 999077, China.

<sup>b</sup> HKUST- Shenzhen Research Institute, No. 9 Yuexing 1st RD, South Area Hi-tech Park, Nanshan, Shenzhen 518057 China.

<sup>c</sup> Center for Aggregation-Induced Emission, SCUT-HKUST Joint Research Institute, State Key Laboratory of Luminescent Materials and Devices, South China University of Technology, Guangzhou 510640, China.

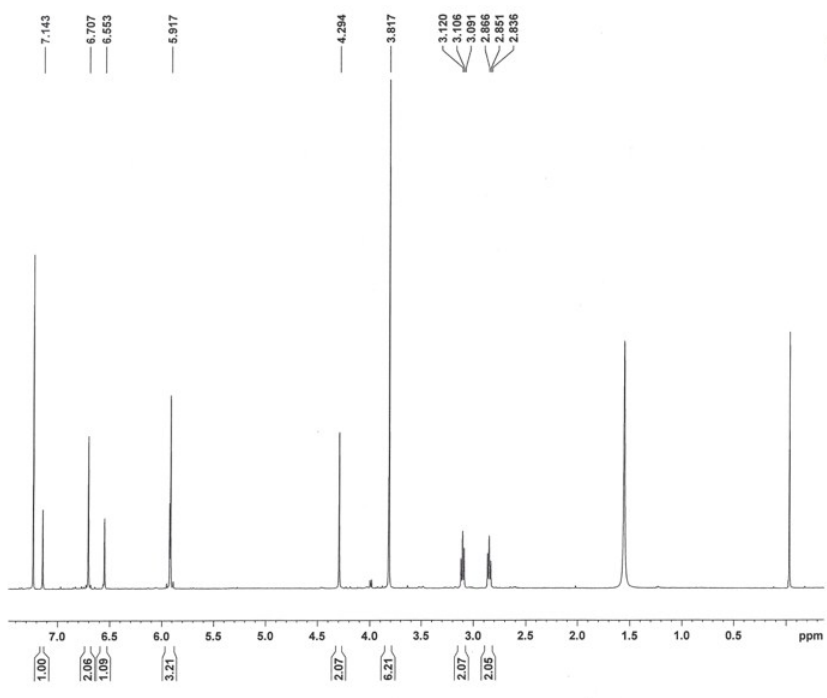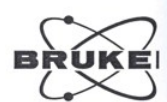

Current Data Parameters  
NAME DHB  
EXPNO 2  
PROCNO 1

F2 - Acquisition Parameters  
Date\_ 20181010  
Time 20.53  
INSTRUM spect  
PROBHD 5 mm PABBO 1  
PULPROG zg30  
TD 65536  
SOLVENT CDCl3  
NS 16  
DS 2  
SWH 8223.685 Hz  
FIDRES 0.125483 Hz  
AQ 3.9946387 sec  
RG 724  
DW 60.800 usec  
DE 6.00 usec  
TE 294.0 K  
D1 1.00000000 sec  
TD0 1

===== CHANNEL f1 =====  
NUC1 1H  
P1 15.80 usec  
PL1 -1.00 dB  
SFO1 400.1324710 MHz

F2 - Processing parameters  
SI 32768  
SF 400.1300198 MHz  
WDW EM  
SSB 0  
LB 0.30 Hz  
GB 0  
PC 1.00

Fig. S1 <sup>1</sup>H NMR spectrum of dhBBR in CDCl<sub>3</sub>.

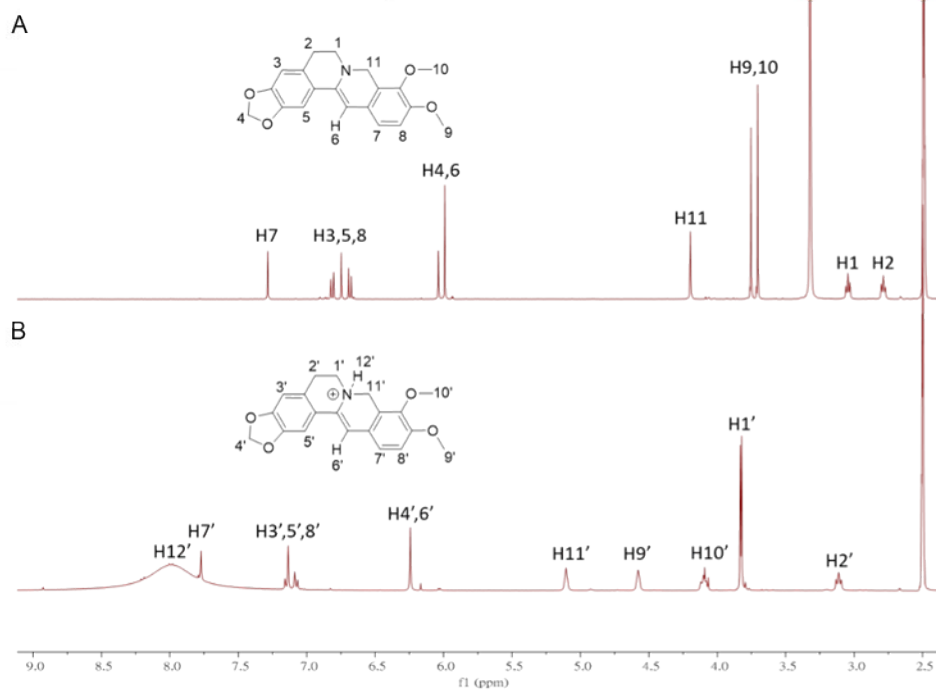

**Fig. S2**  $^1\text{H}$  NMR spectra of dhBBR before (A) and after (B) the addition of trifluoroacetic acid in  $\text{DMSO-d}_6$  solution.

gy-berhydro, MW=337; NH3  
tan170612\_1 107 (1.784) Cm (102:109-2:31)

TOF MS Cl+  
2.26e3

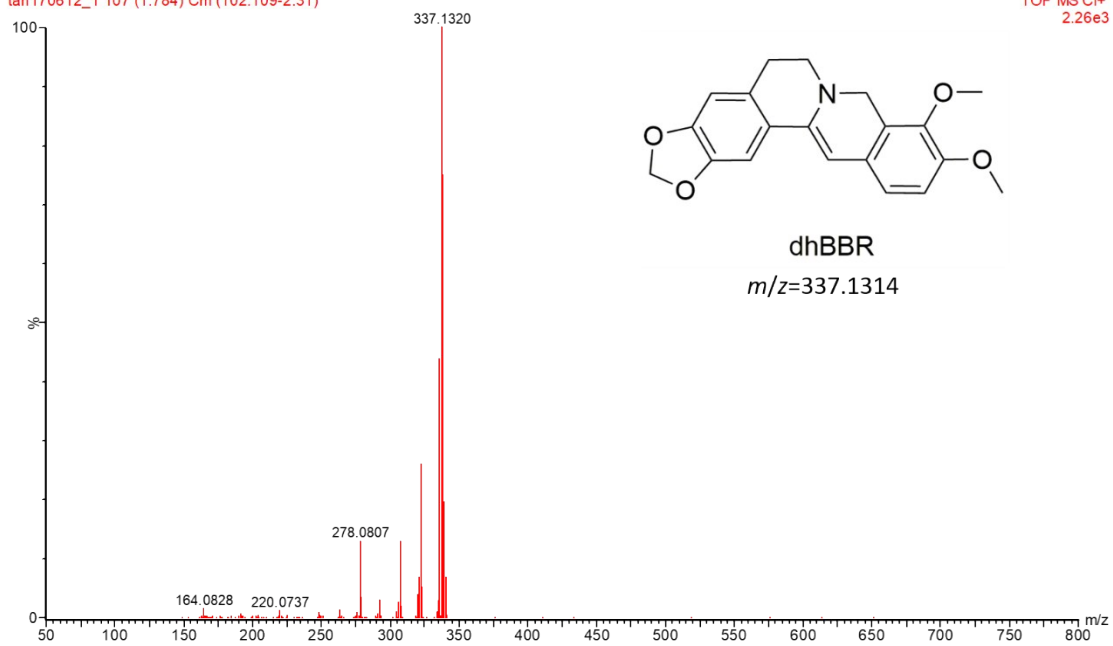

Fig. S3 HRMS spectrum of dhBBR.

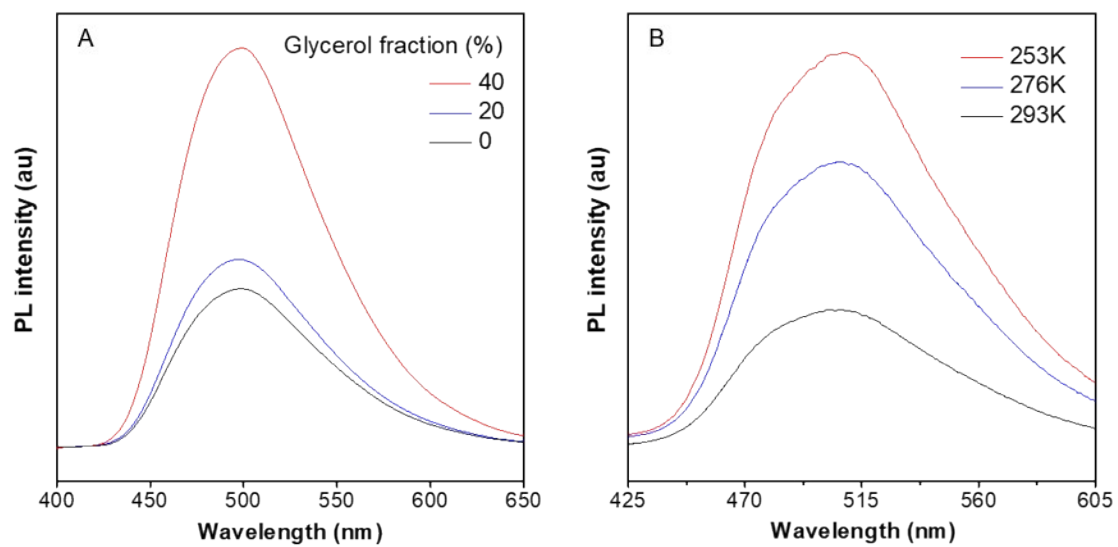

**Fig. S4** (A) PL spectra of dhBBR in ethylene glycol/glycerol mixtures with different fractions of glycerol. (B) Temperature dependence of the PL spectra of dhBBR in DMSO solution. Solution concentration: 10  $\mu$ M; Excitation wavelength: 365 nm.

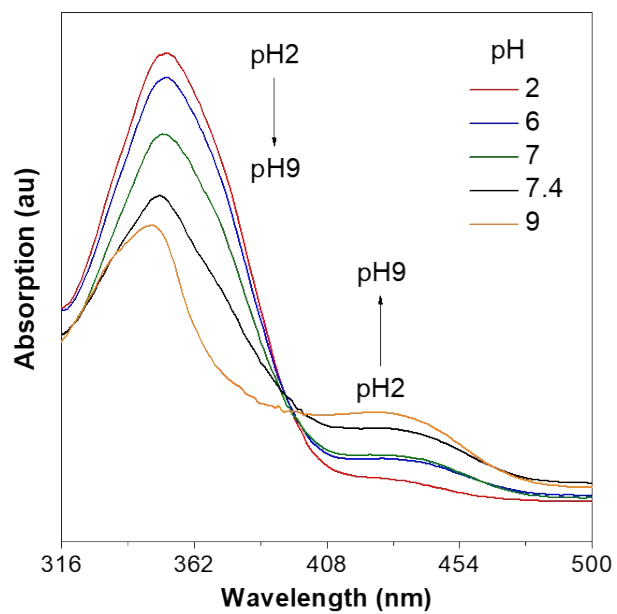

**Fig. S5** UV-Vis spectra of dhBBR in the PBS buffer solutions with different pH values. [dhBBR] = 10  $\mu$ M.

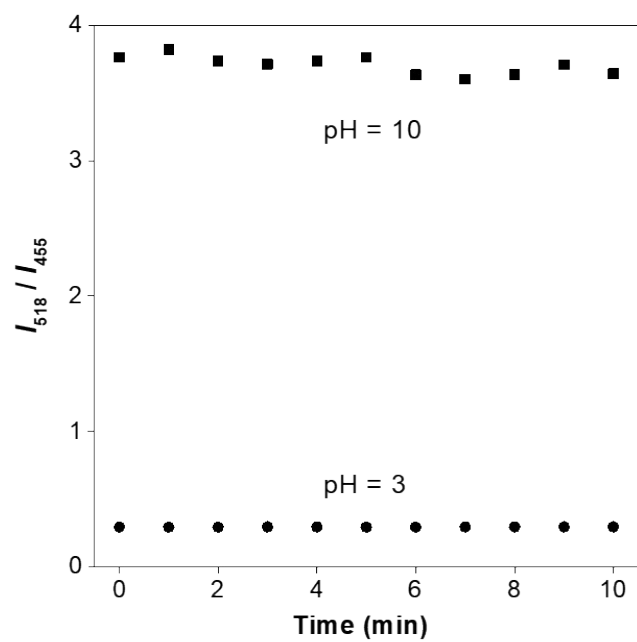

**Fig. S6** Time course of the fluorescence intensity ratios ( $I_{518}/I_{455}$ ) of dhBBR (10  $\mu$ M) in PBS buffer at pH 3 and pH 10.

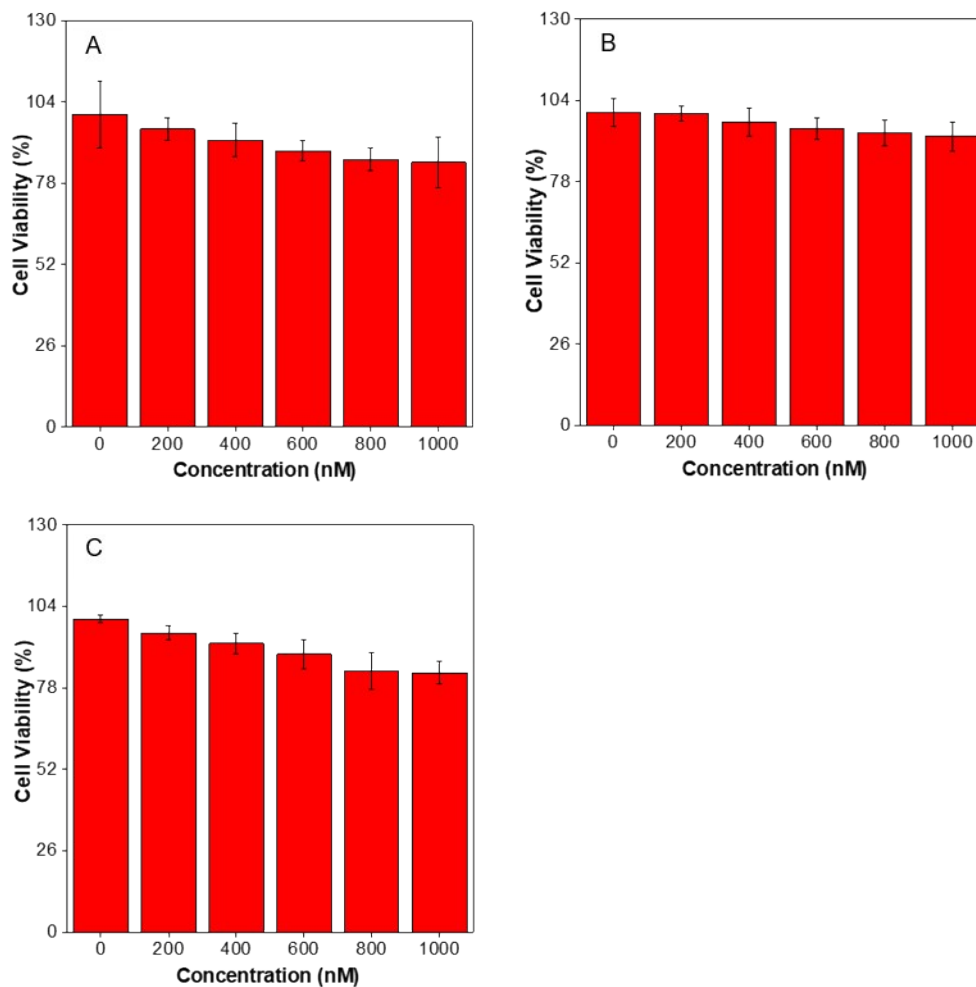

**Fig. S7** Viability of A549 cells (A), HEK 293T cells (B) and HeLa cells in the presence of different concentrations of dhBBR for 24 h. Data are expressed as mean value of six separate trials.



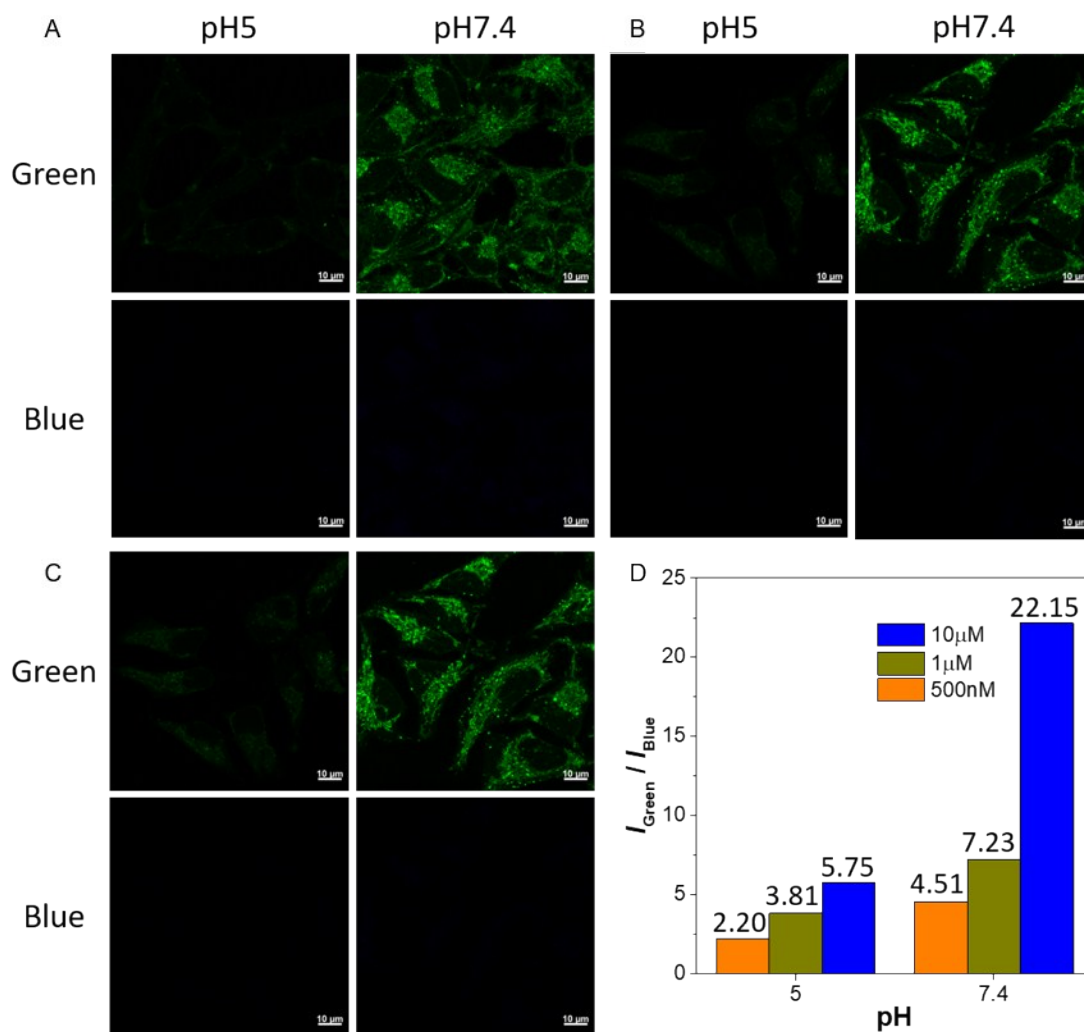

**Fig. S8** CLSM images of HeLa cells stained with varied concentrations of dhBBR in different pH PBS buffers for 30 min. dhBBR Concentrations: (A) 500 nM. (B) 1 μM. (C) 10 μM. (D) Relative PL intensity of varied concentrations of dhBBR treated HeLa cells in different pH PBS buffers. Scale bar = 10 μm.
